# Supplementary material for: Real-World Incidence of Suboptimal Response to Anti-Tumor Necrosis Factor Therapy for Ulcerative Colitis: A Nationwide Population-Based Study
Source: PubMed Central journal article supplement — Gut Liver. 2021 Nov 15;15(6):867–77. doi: 10.5009/gnl20353 (PMC8593500; doi:10.5009/gnl20353), 2021-11-15
Supplement: gnl-15-6-867-supple.pdf [file gnl-15-6-867-supple.pdf]

**Supplementary Table 1.** Disease Category and ICD-10 Codes for Included and Excluded Diseases

| Disease category         | Disease subgroup                                                                     | ICD-10 codes |
|--------------------------|--------------------------------------------------------------------------------------|--------------|
| Included diseases        |                                                                                      |              |
| Ulcerative colitis       | Ulcerative colitis                                                                   | K51.x        |
| Excluded diseases        |                                                                                      |              |
| Rheumatoid arthritis     | Seropositive rheumatoid arthritis                                                    | M05.x        |
|                          | Other rheumatoid arthritis                                                           | M06.x        |
| Psoriasis                | Psoriasis                                                                            | L40.x        |
| Psoriatic arthritis      | Distal interphalangeal psoriatic arthropathy                                         | M07.0        |
|                          | Arthritis mutilans                                                                   | M07.1        |
|                          | Psoriatic spondylitis                                                                | M07.2        |
|                          | Other psoriatic arthropathies                                                        | M07.3        |
|                          | Arthropathic psoriasis                                                               | L40.5        |
| Crohn's disease          | Crohn's disease [regional enteritis]                                                 | K50.x        |
| Ankylosing spondylitis   | Ankylosing spondylitis                                                               | M45.x        |
| Axial spondyloarthritis  | Spinal enthesopathy                                                                  | M46.0        |
|                          | Sacroiliitis, NEC                                                                    | M46.1        |
|                          | Other specified inflammatory spondylopathies                                         | M46.8        |
|                          | Inflammatory spondylopathy, unspecified                                              | M46.9        |
| Behçet's disease         | Intestinal Behçet's disease                                                          | M35.2        |
| Hidradenitis suppurativa | Hidradenitis suppurativa                                                             | L73.2        |
| Uveitis                  | Iridocyclitis                                                                        | H20.x        |
|                          | Chorioretinal inflammation                                                           | H30.x        |
|                          | Other endophthalmitis                                                                | H44.1        |
|                          | Iridocyclitis in infectious and parasitic diseases classified elsewhere              | H22.0        |
|                          | Iridocyclitis in other diseases classified elsewhere                                 | H22.1        |
|                          | Other disorders of the iris and ciliary body in diseases classified elsewhere        | H22.8        |
|                          | Chorioretinal inflammation in infectious and parasitic diseases classified elsewhere | H32.0        |
|                          | Other chorioretinal disorders in diseases classified elsewhere                       | H32.8        |

ICD-10, International Classification of Diseases, 10th revision; NEC, not elsewhere classified.

**Supplementary Table 2.** Surgery Name and Surgery Code

| Surgery name                 | Detailed name                                       | Surgery code |
|------------------------------|-----------------------------------------------------|--------------|
| Colectomy                    | Colectomy-subtotal                                  | Q1261, Q1262 |
|                              | Colectomy-total                                     | QA672, Q2672 |
|                              | Colectomy-segmental resection                       | QA673, Q2673 |
|                              | Right or left hemicolectomy                         | QA671, Q2671 |
| Colostomy                    | Colectomy with proximal colostomy and distal stump  | QA679, Q2679 |
| Ileostomy                    | Total colectomy (with ileostomy)                    | Q2925, QA925 |
| Ileal pouch-anal anastomosis | Total colectomy (with ileal pouch-anal anastomosis) | Q2926, QA926 |
|                              | Ileal pouch-anal anastomosis                        | Q2901        |
